# Supplementary material for: Enzymatic Characterization of Wild-Type and Mutant Janus Kinase 1
Source: PubMed Central journal article supplement (PMC6896158; doi:10.3390/cancers11111701), 2019-11-01

Supplementary Figure S1

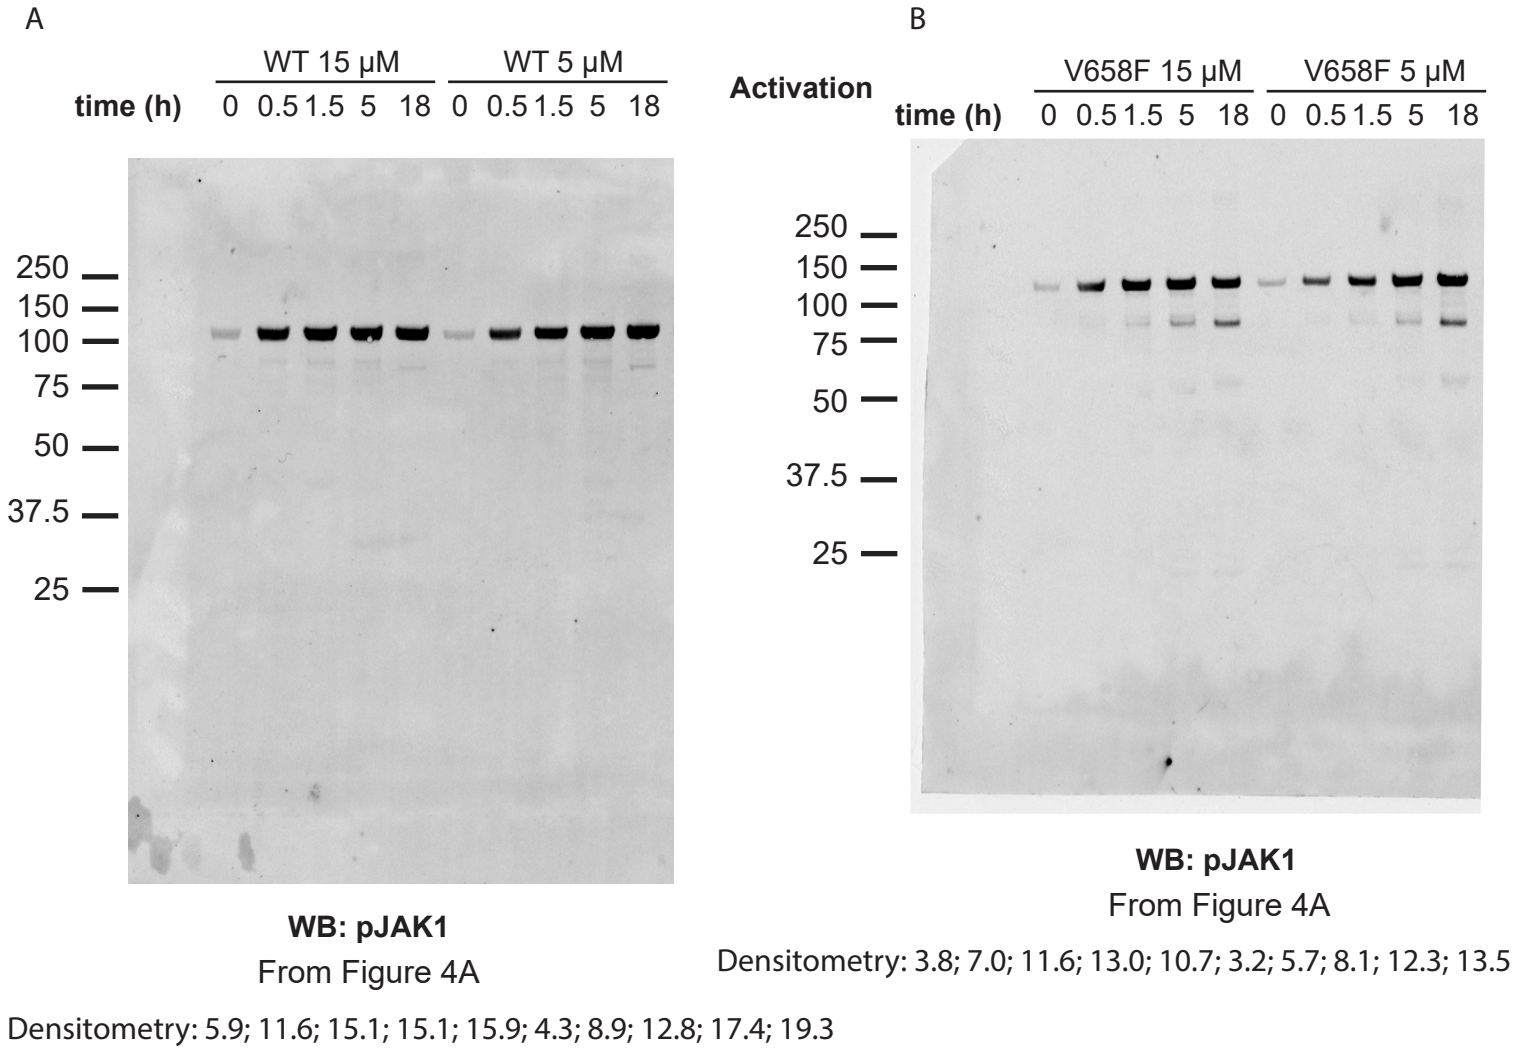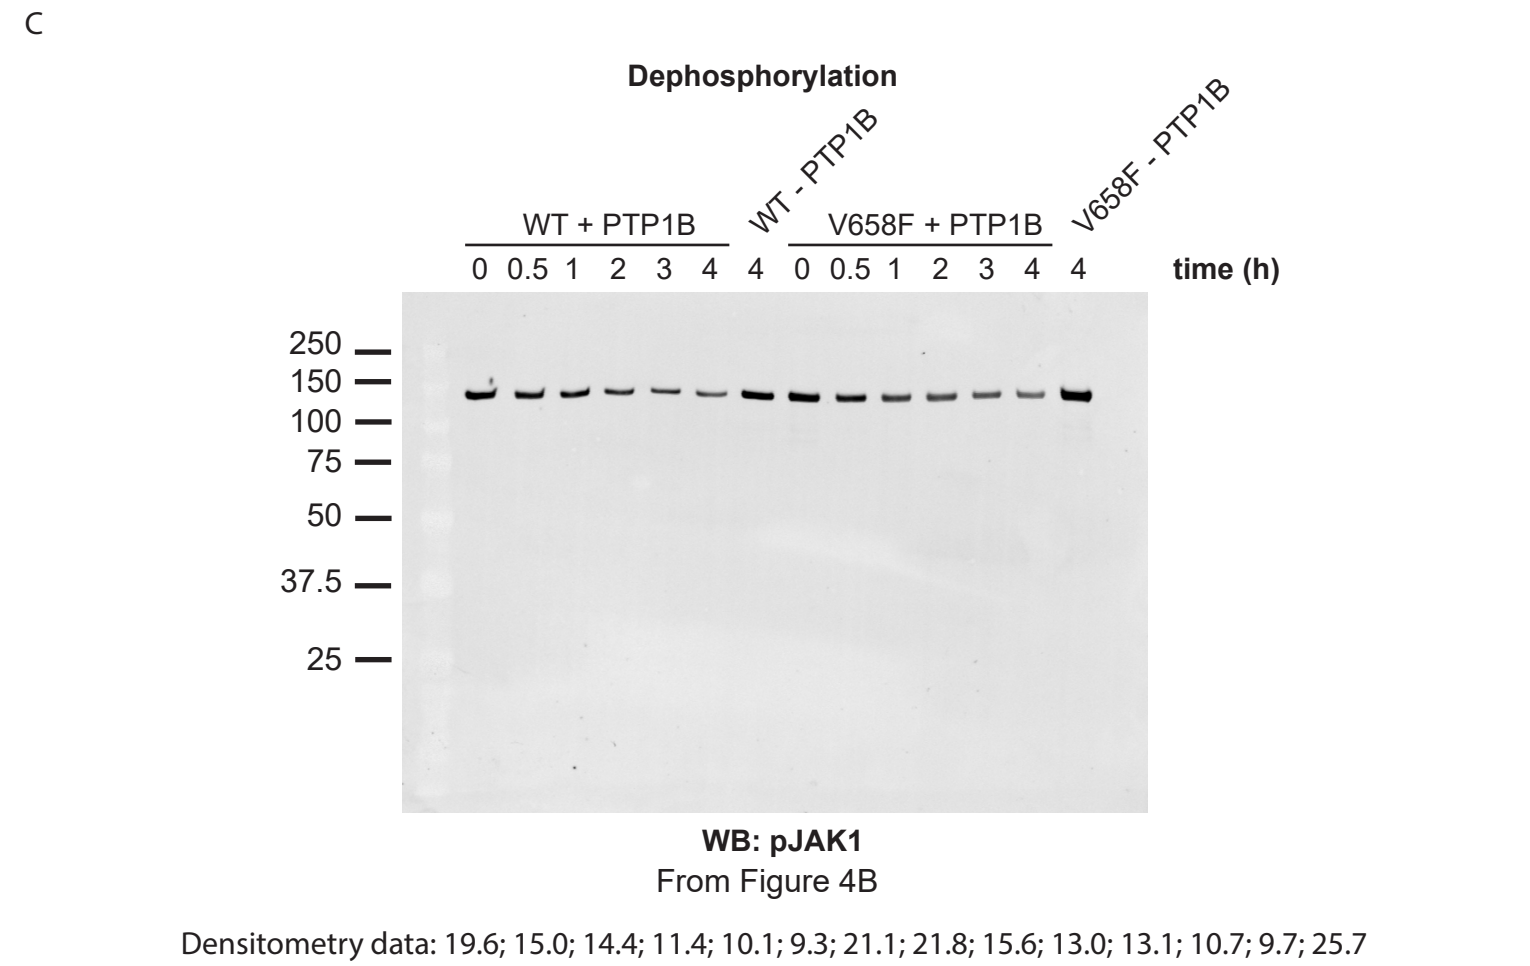

Supplement: cancers-11-01701-s001.pdf [file cancers-11-01701-s001.pdf]
